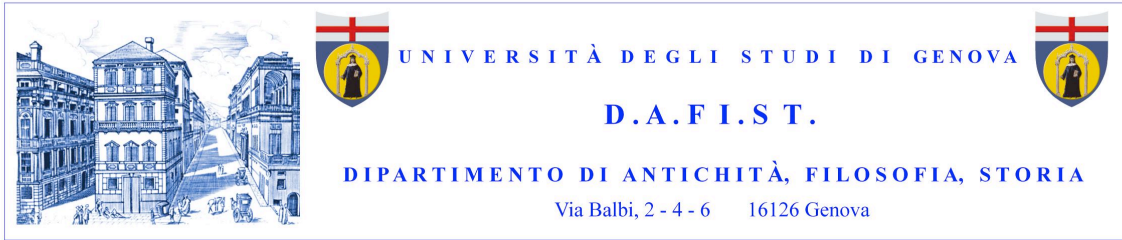

July 16, 2020

Dear Dr Varalli,

I am pleased to confirm that your article

**Alessandra Varalli et al. : Ricostruzione dei pattern alimentari e delle pratiche di allattamento e svezzamento dal Neolitico alle età dei metalli tramite analisi multi-isotopiche della dentina incrementale e del collagene osseo**

has been accepted for publication and will be included in the following volume which is in the final stages of preparation by:

*Fabio Negrino, Vincenzo Tiné (Eds) - LIII Scientific Meeting of the Italian Institut for Prehistory and Protohistory. Prehistory and Protohistory In Liguria. Rivista di Scienze Preistoriche (2020).*

I am expecting the submission of the final manuscript very soon. Publication will then follow quickly.

Publication will be in print and e-format.

Yours sincerely

*Prof. Fabio Negrino*

*Editor of the volume*

*DAFIST – Department of Antiquities, Philosophy and History  
University of Genoa  
Via Balbi, 2 – I-16126 Genova (Italy)  
e-mail: fabio.negrino@unige.it  
Tel. (0039)-010-209-51803  
Tel. (0039)-010-209-59712 (Laboratorio)  
Mobile (0039)-347-5349133*
